1 **Identification of French Guiana anopheline mosquitoes by MALDI-TOF MS profiling using**  
2 **protein signatures from two body parts.**

3 Sébastien Briolant<sup>1,2</sup>, Monique de Melo Costa<sup>1,2</sup>, Christophe Nguyen<sup>1,2</sup>, Isabelle Dusfour<sup>3</sup>, Vincent  
4 Pommier de Santi<sup>4</sup>, Romain Girod<sup>3,5</sup>, Lionel Almeras<sup>1,2</sup>

5

6 <sup>1</sup>Unité de Parasitologie et Entomologie, Département de Microbiologie et Maladies Infectieuses,  
7 Institut de Recherche Biomédicale des Armées, Marseille, France.

8 <sup>2</sup>Aix Marseille Université, IRD, AP-HM, SSA, UMR Vecteurs – Infections Tropicales et  
9 Méditerranéennes (VITROME), IHU - Méditerranée Infection, 19-21 bd Jean Moulin, 13385  
10 Marseille, cedex 5, France.

11 <sup>3</sup>Unité d'Entomologie Médicale, Institut Pasteur de la Guyane, Cayenne, French Guiana.

12 <sup>4</sup>Centre d'Epidémiologie et de Santé Publique des Armées, Marseille, France.

13 <sup>5</sup>Medical Entomology Unit, Institut Pasteur de Madagascar, P.O. 1274, Ambatofotsikely – 101  
14 Antananarivo, Madagascar

15

16 **\*Corresponding author:** Dr. Lionel ALMERAS. Unité de Parasitologie et Entomologie (IRBA),  
17 Institut Hospitalo-Universitaire Méditerranée Infection, 19-21 Boulevard Jean Moulin 13385  
18 Marseille cedex 05, France. Phone: 33 (0) 4 91 32 43 75. Fax: 33 (0) 4 91 83 03 90. E-mail address:  
19 [almeras.lionel@gmail.com](mailto:almeras.lionel@gmail.com).

20 **Authors' emails:** SB: [sbriolant@wanadoo.fr](mailto:sbriolant@wanadoo.fr); MMC: [mcosta.monique@gmail.com](mailto:mcosta.monique@gmail.com); CNG:  
21 [christophenguyen2005@yahoo.fr](mailto:christophenguyen2005@yahoo.fr); ID: [isabelle.dusfour@pasteur.fr](mailto:isabelle.dusfour@pasteur.fr); VPS:  
22 [v.pommierdesanti@gmail.com](mailto:v.pommierdesanti@gmail.com); RG: [rgirod@pasteur.mg](mailto:rgirod@pasteur.mg); LA: [almeras.lionel@gmail.com](mailto:almeras.lionel@gmail.com).

23

24 **Running title: French Guiana Anopheline identification by MALDI-TOF MS**

25 **Abstract**

26 In French Guiana, the malaria, a parasitic infection transmitted by *Anopheline* mosquitoes, remains a  
27 disease of public health importance. To prevent malaria transmission, the main effective way remains  
28 *Anopheles* control. For an effective control, accurate *Anopheles* species identification is indispensable  
29 to distinguish malaria vectors from non-vectors. Although, morphological and molecular methods are  
30 largely used, an innovative tool, based on protein pattern comparisons, the Matrix Assisted Laser  
31 Desorption / Ionization Time-of-Flight Mass Spectrometry (MALDI-TOF MS) profiling, emerged  
32 this last decade for arthropod identification. However, the limited mosquito fauna diversity of  
33 reference MS spectra remains one of the main drawback for its large usage. The aim of the present  
34 study was then to create and to share reference MS spectra for the identification of French Guiana  
35 *Anopheline* species. A total of eight distinct *Anopheles* species, among which four are malaria vectors,  
36 were collected in 6 areas. To improve *Anopheles* identification, two body parts, legs and thoraxes,  
37 were independently submitted to MS for the creation of respective reference MS spectra database  
38 (DB). This study underlined that double checking by MS enhanced the *Anopheles* identification  
39 confidence and rate of reliable classification. The sharing of this reference MS spectra DB should  
40 made easier *Anopheles* species monitoring in endemic malaria area to help malaria vector control or  
41 elimination programs.

42

43 **Keywords:** *Anopheles*; Identification; French Guiana; MALDI-TOF MS; Innovative strategy.

44

## 45 **Introduction**

46 Since 2005, malaria cases declined significantly in French Guiana, an overseas territory of France  
47 located in South-America. The number of diagnosed cases has decreased from 4,479 cases in 2005  
48 to 597 cases in 2017 [1]. However, the disease is still endemic in the inland forested areas, especially  
49 in illegal gold mining areas and so remains of public health importance [2–4]. Majority of the cases  
50 are caused by *Plasmodium vivax* (89%, p=531/597), followed by *P. falciparum* (11%, p=66/597).

51 *Anopheles* mosquitoes are known for their role in transmitting malaria. Historically, thirty-three  
52 mosquitoes from the genus *Anopheles* have been reported in French Guiana [5]. Members in the  
53 subgenus *Anopheles* and *Nyssorhynchus* have been implicated in malaria transmission in French  
54 Guiana. *Anopheles darlingi* is the recognized primary vector in the territory [6–9]. Recently, *An.*  
55 *nuneztovari* *sl*, *An. oswaldoi* *sl*, *An. intermedius*, *An. marajoara* and *An. ininii* were found naturally  
56 infected with *Plasmodium* sporozoites and were suspected to be secondary vectors [2,3,10]. Malaria  
57 transmission is further complicated as some of these secondary vectors belong to species complexes,  
58 characterized by similar morphological characteristics, such as *An. oswaldoi* [11], *An. marajoara* [12]  
59 and *An. nuneztovari* [13].

60 A rapid and accurate identification of *Anopheles* species is then critical when designing malaria vector  
61 control strategies which should be species-specific to be effective. The most common method for  
62 mosquito species identification remains the utilization of morphological criteria [14]. However,  
63 morphological identification is skill dependent requiring entomological expertise. The correct species  
64 assignation could also be compromised for damaged specimens with the loss of determinant  
65 characters. Moreover, the description of morphological characteristic variations between intact adult  
66 conspecific specimens underlined that correct mosquito species classification could be held only by  
67 experienced mosquito taxonomists [15]. Additionally, the availability of mosquito taxonomic keys is  
68 a cornerstone for identification success. Unfortunately, morphological keys are still missing for  
69 numerous *Anopheles* species, notably for closely related-species (cryptic and complex species).

70 The emergence of molecular biology approaches in the 2000's has solved some long-standing  
71 taxonomic questions [16]. However, the choice of the target gene sequence for accurate mosquito  
72 identification could be complex. In South America, *Anopheles* species were classified by using  
73 different target genes: either 18S rRNA [17], either the second internal transcribed spacer (ITS2) [18]  
74 or cytochrome c oxidase I (COI) [19]. The absence of consensus for mosquito species identification  
75 complicate studies comparison. The development of the Barcode of Life Data (BOLD) system  
76 contributed to standardize gene sequencing for organism identification [20]. Nevertheless, for some  
77 cryptic mosquito species (eg, *An. gambiae* complex), the sequencing of COI could be insufficient to  
78 classify them unambiguously [21] and the sequencing of a second gene could be required [22]. For  
79 instance, some *Anopheles* and *Culex* sibling species could not be distinguished using uniquely the  
80 mitochondrial COI barcode [23,24]. Moreover, despite the large advances of this strategy this last  
81 decade, notably by shortening experiment duration and costs of reagents, gene sequencing remains  
82 time-consuming and expansive [25]. The development of a quick and low cost approach for mosquito  
83 monitoring with elevate rate of reliable identification is always in high demand.

84 The MALDI-TOF MS profiling have recently demonstrated its performance for reliable arthropod  
85 identification [25], including mosquitoes at adult [26] and immature stages [27,28]. At adult stage,  
86 for specimen identification by MS, different mosquito body parts were selected such as the  
87 cephalothorax [29,30] or legs, but this last compartment remains the more frequently used [26,31–  
88 33]. The recent successful identification of mosquitoes at immature stages by MALDI-TOF MS  
89 profiling validated the efficiency of this MS strategy for field monitoring of *Culicidae* [19]. The  
90 regent low costs, the rapidity and technical simplicity of protocols participated to the success of this  
91 approach. However, conversely to molecular analyses, MS protein profiles from conspecific  
92 specimens could vary according to several factors such as sample storing mode, developmental stage,  
93 homogenization mode or body part used [25,34]. To overcome these limitations, standardized  
94 protocols were established for some arthropod families [35] including mosquitoes [36]. The  
95 standardization of the protocols facilitated result comparisons and reference MS spectra sharing.

96 The main problem with legs is that they are breakable. The loss of one to all mosquito legs during  
97 trapping and/or storing is not infrequent, which could compromise specimen identification by MS.  
98 The selection of a second body part, the mosquito thorax, revealed that it could also generate mosquito  
99 species-specific MS but distinct from legs of conspecific specimens [37]. This last study underlined  
100 that the query of these two body parts against the reference MS spectra database (DB) improved  
101 mosquito species identification with accuracy and confidence. This pioneering study assessed to  
102 distinct 7 mosquito species from 4 genera living in sympatry in Guadeloupe Island [38].  
103 The aim of the present study was to assess whether the submission of two body part could improve  
104 *Anopheles* identification from French Guiana. The creation of a reference MS spectra DB should  
105 made easier *Anopheles* species monitoring in endemic malaria area to help malaria vector control or  
106 elimination programs.

## 107 **Methods**

### 108 *Mosquito collection and dissection*

109 *Anopheles* adult female mosquitoes were selected from field mosquito collections done in 6 distinct  
110 sites from French Guiana, during entomological surveys, using different collection methods, over  
111 different sampling periods (Figure 1) [3,39–41]. After collections, mosquitoes were sorted by genera  
112 and *Anopheles* mosquitoes were morphologically identified under a binocular loupe at a  
113 magnification of  $\times 56$  (Leica M80, Leica, Nanterre, France) using standard taxonomic keys for the  
114 region (Floch and Abonnenc 1951, Forattini 1962, Faran and Linthicum 1981). *Anopheles* specimens  
115 were then stored individually at  $-20^{\circ}\text{C}$ . According to their availability, one to 22 specimens per  
116 *Anopheles* species were selected for molecular and MS analyses (Table 1). Legs and thoraxes from  
117 mosquitoes were dissected for MALDI-TOF MS analysis as previously described [38]. The  
118 abdomens, wings and heads were kept for molecular analyses.

119

### 120 *Molecular identification of mosquitoes*

121 DNA was individually extracted from the head and abdomen of all mosquito specimens ( $n=112$ )  
122 using the QIAamp DNA tissue extraction kit (Qiagen, Hilden, Germany) according to the  
123 manufacturer's instructions. Molecular identification of mosquito at the species level was performed  
124 by sequencing the PCR product of a fragment of the cytochrome c oxidase I gene (*COI*) (LCO1490  
125 (forward): 5'-GGTCAACAAATCATAAAGATATTGG-3'; HC02198 (reverse): 5'-  
126 TAAACTTCAGGGTGACCAAAAAATCA-3') as previously described [19,42]. The sequences  
127 were assembled and analyzed using the Molecular Evolutionary Genetics Analysis (MEGA) software  
128 version 7.0 and BioEdit Sequence alignment editor software version 7.2.6.0. All sequences were  
129 blasted against GenBank (<http://blast.ncbi.nlm.nih.gov/Blast.cgi>) and against the Barcode of Life  
130 Data Systems (BOLD; <http://www.barcodinglife.org>; [20]) to assign unknown *COI* sequences to  
131 mosquito species.

132

133 *Sample homogenization and MALDI-TOF MS analysis*

134 Each dissected compartment (legs and thoraxes) was homogenized individually 3 x 1 minute at 30  
135 Hertz using TissueLyser (Qiagen) and glass beads (#11079110, BioSpec Products, Bartlesville, OK,  
136 US) in a homogenization buffer composed of a mix (50/50) of 70% (v/v) formic acid (Sigma) and  
137 50% (v/v) acetonitrile (Fluka, Buchs, Switzerland) according to the standardized automated setting  
138 as described previously [43]. After sample homogenization, a quick spin centrifugation at 200 g for  
139 1 min was then performed and 1  $\mu$ L of the supernatant of each sample was spotted on the MALDI-  
140 TOF steel target plate in quadruplicate (Bruker Daltonics, Wissembourg, France). After air-drying, 1  
141  $\mu$ L of matrix solution composed of saturated  $\alpha$ -cyano-4-hydroxycinnamic acid (Sigma, Lyon,  
142 France), 50% (v/v) acetonitrile, 2.5% (v/v) trifluoroacetic acid (Aldrich, Dorset, UK) and HPLC-  
143 grade water was added. To control matrix quality (i.e. absence of MS peaks due to matrix buffer  
144 impurities) and MALDI-TOF apparatus performance, matrix solution was loaded in duplicate onto  
145 each MALDI-TOF plate alone and with a bacterial test standard (Bruker Bacterial Test Standard, ref:  
146 #8255343).

147

148 *MALDI-TOF MS parameters*

149 Protein mass profiles were obtained using a Microflex LT MALDI-TOF Mass Spectrometer (Bruker  
150 Daltonics, Germany), with detection in the linear positive-ion mode at a laser frequency of 50 Hz  
151 within a mass range of 2-20 kDa. The setting parameters of the MALDI-TOF MS apparatus were  
152 identical to those previously used [44].

153

154 *MS spectra analysis*

155 MS spectra profiles were firstly controlled visually with flexAnalysis v3.3 software (Bruker  
156 Daltonics). MS spectra were then exported to ClinProTools v2.2 and MALDI-Biotyper v3.0. (Bruker  
157 Daltonics) for data processing (smoothing, baseline subtraction, peak picking). MS spectra  
158 reproducibility was assessed by the comparison of the average spectral profiles (MSP, Main Spectrum

159 Profile) obtained from the four spots for each specimen according to body part with MALDI-Biotyper  
160 v3.0 software (Bruker Daltonics). MS spectra reproducibility and specificity taking into account  
161 mosquito body part were objectified using cluster analyses. Cluster analyses (MSP dendrogram) were  
162 performed based on comparison of the MSP given by MALDI-Biotyper v3.0. software and clustered  
163 according to protein mass profile (i.e. their mass signals and intensities). In addition, to visualize MS  
164 spectra distribution according to body part, principal component analysis (PCA) from ClinProTools  
165 v2.2 software were performed for each species.

166 The top-10 and top-5 of the most intense MS peaks per mosquito species and per body-part were  
167 analyzed with ClinProTools software to estimate their performance to discriminate the *Anopheles*  
168 species for each body-part. The parameter settings in ClinProTools software for spectrum preparation  
169 were as follows: a resolution of 300; a noise threshold of 2.00; a maximum peak shift of 800 ppm and  
170 a match to calibrating agent peaks of 10%. Peak calculation and selection were performed on  
171 individual spectra with a signal-to-noise threshold of 2.00 and an aggregation of 800 ppm. Based on  
172 the peak list obtained for each body part per species, the top-10 and top-5 of the most intense m/z  
173 peaks were selected to include them into the genetic algorithm (GA) model. The selected peaks by  
174 the operator gave a recognition capability (RC) value together with the highest cross-validation (CV)  
175 value. The presence or absence of all discriminating peak masses generated by the GA model was  
176 controlled by comparing the average spectra from each species per body-part.

177

#### 178 *Database creation and blind tests*

179 The reference MS spectra were created using spectra from legs and thorax of two specimens per  
180 species when available using MALDI-Biotyper software v3.0. (Bruker Daltonics) [26]. MS spectra  
181 were created with an unbiased algorithm using information on the peak position, intensity and  
182 frequency. MS spectra from mosquito legs and thoraxes were tested against the in-house MS  
183 reference spectra DB, including already legs and thoraxes reference MS spectra from eight distinct  
184 mosquito species, but none from the *Anopheles* genus [38]. The reliability of species identification



185 was estimated using the log score values (LSVs) obtained from the MALDI Biotyper software v.3.0,  
186 which ranged from 0 to 3. According to previous studies [26,44], LSVs greater than 1.8 were  
187 considered reliable for species identification. Data were analyzed by using GraphPad Prism software  
188 version 5.01 (GraphPad, San Diego, CA, USA).

189

### 190 *Phylogenetic analyses*

191 After gene sequences alignment with the Clustal  $\omega$ 2 algorithm in the MEGA 7.0 software, a maximum  
192 likelihood tree based on the COI gene were constructed using the MEGA 7.0 software [45]. The tree  
193 with the highest log likelihood was kept. The tree is drawn to scale, with branch lengths measured in  
194 the number of substitutions per site. Support for internal nodes was estimated using the nonparametric  
195 bootstrap method with 1000 replications.

196

## 197 **Results**

### 198 *Morphological identification and molecular validation*

199 Among the mosquitoes captured in the 6 distinct sites from French Guiana (Figure 1), uniquely  
200 anopheline specimens were selected. These mosquitoes were classified morphologically into eight  
201 distinct species, six from the *Nyssorhynchus* subgenus (*An. aquasalis*, *An. braziliensis*, *An. darlingi*,  
202 *An. nuneztovari* *sl*, *An. triannulatus* *sl*, *An. oswaldoi* *sl*) and two from the *Anopheles* subgenus (*An.*  
203 *intermedius*, *An. peryassui*) (Table 1). According to their availability, one to 22 specimens per species  
204 were included in the present study. A total of 111 *Anopheles* specimens were selected. The *COI* gene  
205 sequencing of all specimens was done to valid morphological identification. *COI* gene sequences  
206 were queried against GenBank (NCBI) and the Barcode of Life Data (BOLD) Systems. The query of  
207 *COI* gene sequences allowed to obtain reliable mosquito species identification for all samples with  
208 identity ranges of 98-99% against GenBank and 98.15-100% against BOLD databases (Table 1).  
209 Concordant mosquito species identification were obtained between the two molecular DBs. The *COI*  
210 gene sequencing corroborated morphological classifications, at the exception of one mosquito. It was  
211 morphologically classified as *An. peryassui* but molecular analysis revealed that it was identified as  
212 *An. intermedius*. The phylogenetic analysis was done with the *COI* gene sequences of the 15 mosquito  
213 specimens selected for MS reference creation (Additional file 1). Mosquitoes belonging to the same  
214 subgenus clustered together.

### 215 216 *Reproducible and specific MS spectra from both mosquito body parts*

217 MS profiles of high intensity (>2000 a.u.) were obtained for legs (Figure 2A) and thoraxes (Figure  
218 2B) from each of the 111 mosquitoes submitted to MALDI-TOF MS. Visual reproducible MS spectra  
219 were obtained for specimens of the same species according to body part (Figure 2). To evaluate the  
220 reproducibility and specificity of MS spectra from legs and thoraxes according to species, cluster  
221 analyses were performed. Two specimens per species were used for MSP dendrogram creation, at the  
222 exception of *An. oswaldoi* for which only one specimen was available. The clustering of specimens

223 from the same species on the same branch and the absence of species intertwining underlined the  
224 reproducibility and specificity of the protein profiles for each *Anopheles* species for legs (Figure 3A)  
225 and thoraxes (Figure 3B). Interestingly, *Anopheles* species ordination from MSP dendrograms was  
226 not similar between legs and thoraxes of paired species (Figure 3). Nevertheless, *Anopheles* species  
227 from the same subgenus clustered on the same branch on both MSP dendrograms. To visualize  
228 specificity of MS spectra according body part per *Anopheles* species, PCAs were performed. PCAs  
229 revealed a clear separation of the dots corresponding to MS spectra from the legs and thoraxes,  
230 confirming a specificity of MS profiles between these two body parts for the seven *Anopheles* species  
231 tested (Additional file 2).

232 As correct specimen species classification relies mainly on the intensity of resulting MS spectra, we  
233 assessed whether the most intense mass peaks from legs and thoraxes per mosquito species could be  
234 enough to distinct these *Anopheles* species, at the exception of *An. oswaldoi* for which only one  
235 specimen was available. The selection of the top-ten and top-five mass peak lists per species  
236 conducted to a total of 41 and 27 MS peaks for legs and 39 and 24 for thoraxes, respectively  
237 (Additional files S3 and S4). These MS peak lists were included in the genetic algorithm (GA) model  
238 from ClinProTools 2.2 software. The combination of the presence/absence of these top-ten and top-  
239 five mass peak lists per *Anopheles* species displayed, respectively, RC values of 99.6% and 97.0%  
240 and CV values of 97.9% and 98.3% for MS spectra from legs. For MS spectra from thoraxes, RC  
241 values of 99.4% and 97.5% and CV values of 99.8% and 99.6% were obtained for the top-ten and  
242 top-five selected mass peak lists, respectively.

243

#### 244 *MS reference spectra database creation and validation step*

245 MS spectra of legs and thoraxes from the 15 specimens used for MSP dendrogram analysis (Table  
246 1), validated morphologically and molecularly, were added to our MS spectra database (DB)  
247 including already legs and thoraxes reference MS spectra from eight distinct mosquito species [38].  
248 The legs and thoraxes MS spectra from the 96 remaining specimens were queried against this

249 upgraded DB. Interestingly, 100% of the identification results were concordant between paired MS  
250 spectra from legs and thoraxes. Among them, the MS identification of 95 specimens corroborated  
251 morphological results. One specimen, classified as *An. peryassui* based on morphological criteria was  
252 identified as *An. intermedius* based on MS tool with LSVs of 2.40 and 2.49 for legs and thorax,  
253 respectively, confirming the results of *COI* gene sequencing. The LSVs ranged from 1.84 to 2.56 for  
254 legs and from 1.60 to 2.61 for thoraxes (Additional file S5). As a threshold LSV upper than 1.8 is  
255 require for reliable identification [26,43], correct classification could be considered for 100% (96/96)  
256 of MS spectra from legs and 96.9% (3/96) from thoraxes. However, if we considered the LSV results  
257 from paired-samples per specimen, 100% of the mosquitoes tested, succeeded to obtain a LSV upper  
258 than 1.8 for at least one body-part (Figure 4). Interestingly, an increase of the LSV cut-off at 2.0,  
259 which improves identification confidence, revealed that 95.8% (92/96) and 88.5% (85/96) of the  
260 specimens reached this threshold, based on their legs and thoraxes MS spectra, respectively.  
261 However, the rate of at least one body-part from paired-samples per specimen achieving this threshold  
262 (LSVs>2.0) remained at 100%.

## 263 **Discussion**

264 The correct identification of mosquito species is essential for adapted control management, allowing  
265 to index circulating species in a given region and, consequently, to estimate vector borne diseases  
266 transmission risks. Border regions such as French Guiana may be influenced by their neighboring  
267 countries. The legal and illegal flow of human and merchandises through this frontier could induce  
268 mosquito vectors migration and conducting to colonization of new areas. Solely, a rapid, accurate  
269 and low cost surveillance method of mosquitoes will succeed to improve control measures.

270 In French Guiana, *An. darlingi* is the main malaria vector transmitting several *Plasmodium* species,  
271 such as *P. falciparum* and *P. vivax* [46], this last one representing about 75% of human cases [47]. In  
272 addition to *An. darlingi*, other *Anopheles* species were reported to transmit *Plasmodium* pathogens in  
273 this area during their blood feeding [10,41]. Moreover these malaria vectors live in sympatry with  
274 other anopheline species non-malaria vectors [40]. Indeed, in an effective program aiming to prevent  
275 or to eliminate malaria transmission, an accurate identification of *Anopheles* species remains a key  
276 factor. The recent repetitive success of the use of MALDI-TOF MS profiling for arthropod  
277 identification, including mosquitoes, was applied in the present work to implement our home-made  
278 MS reference spectra DB with anopheline specimens from French Guiana and to palliate of the  
279 limitations of morphological and molecular analyses [25].

280 In the present study, we confirmed that legs and thoraxes MS spectra from paired-specimens of the  
281 same species were distinct at least for the seven species for which more than one specimen was  
282 available. The species-specificity demonstrated for each body-part, underlined that these two  
283 compartments could be used independently for mosquito identification. The independent MS  
284 submission of several body-part to MALDI-TOF MS for specimen identification, was recently  
285 reported for mosquitoes [38] but also for ticks [48,49]. The advantages to test two distinct body parts  
286 are the possibility to cross-validate the results and to improve rate of identification confidence and  
287 reliability. Effectively, the combination of the results obtained independently by the query against the  
288 MS reference DB conducted to concordant results for each body part tested. Here, based on

289 morphological criteria, a specimen was classified as *An. peryassui*. The MS submission of its legs  
290 and thorax indicated a matching with *An. intermedius* MS reference spectra for both body parts with  
291 high LSVs (>2.40), which was concordant with *COI* gene sequencing. Moreover, if the cut-off  
292 threshold of LSV to consider identification as reliable was raised to 2.0, 100% of the specimens  
293 succeeded to reach this cut-off with MS spectra from at least one body part. Finally, the concordance  
294 of the MS identification results between the two body-parts more the elevate LSVs obtained are  
295 complementary data which improve identification confidence. The previous study using two body  
296 parts for mosquito identification was done on mosquitoes from distinct genera [38]. Here, the eight  
297 mosquito species came all from the *Anopheles* genus including two subgenera, *Nyssorhynchus* and  
298 *Anopheles*. The correctness identification of mosquito specimens by MALDI-TOF MS profiling for  
299 these close-related *Anopheles* species comforts the accuracy of this innovative tool.

300 Among the mosquito species included in the MS reference spectra DB, 4 species are malaria vectors  
301 (*An. darlingi*, *An. nuneztovari* *sl*, *An. intermedius*, *An. oswaldoi* *sl*), for the 4 remaining species their  
302 malaria vector competence was not yet demonstrated (*An. aquasalis*, *An. braziliensis*, *An.*  
303 *triannulatus* *sl*, *An. peryassui*) [5]. Interestingly, malaria vectors and non-vectors are present in each  
304 of these two subgenera, underlining the importance to classify them correctly for disease prevention  
305 and vector control of species living in sympatric.

306 The main risks of misidentification or to fail identification by MALDI-TOF MS profiling are  
307 generally attributed either to the comprehensiveness of the species included in the MS reference  
308 database, or more frequently either to the low intensity of MS spectra. The problem of incomplete  
309 reference MS database could be easily solved by performing *COI* gene sequencing of un-matched  
310 good quality MS spectra, using the remaining body part of the specimen (ie, head, abdomen or wings).  
311 In case of new mosquito species, the addition of respective MS spectra, not yet included in the MS  
312 reference DB, could be done. The application of this strategy could resolved step by step MS spectra  
313 of good quality failing to find correspondence in the reference MS DB. Concerning the MS spectra  
314 un-matched, attributed to the low intensity of protein profiles, this phenomenon is frequently

315 observed for legs MS spectra due to the low protein quantity contained in this compartment [26].  
316 Moreover, as the legs are highly breakable, it is frequent that the loose of one to five legs occurred  
317 during specimen collection, transport or storing. This decrease of leg number reduces the success rate  
318 of specimen identification [43]. Moreover, for specimens which have lost all legs, their identification  
319 become not possible if the identification was based uniquely on this compartment by MS. The  
320 creation of reference MS spectra from two distinct mosquito body parts allows to succeed specimen  
321 identification by this rapid proteomic approach.

322 Moreover, in the present work, it was highlighted that the classification of *Anopheles* species could  
323 be correctly done using the most intense MS peaks. Effectively, the selection of the top-10 or also the  
324 top-5 of the MS peaks possessing the higher intensity appeared sufficiently discriminants to classify  
325 correctly these mosquito species. This correct classification is valid for both body-parts. These results  
326 underline that a correct identification remain possible with MS spectra of low intensity for which  
327 uniquely the most intense MS peaks could be detected.

328 The comparison of MSP dendrograms between legs and thoraxes revealed that, despite species from  
329 the same subgenus were clustered in the same branch, the ordination of the species inside these  
330 branches was not similar. This unreproducible classification objectifies that the MS profiles proximity  
331 were different between the *Anopheles* species for legs and thorax. These distinct ordination of species  
332 based on their MS profiles, should reduce the risk of misidentification by the submission of both body  
333 parts. Interestingly, none of these MSP dendrograms proposed a classification comparable with those  
334 obtained using *COI* gene sequences for phylogenetic tree construction. The MSP dendrograms are  
335 not adapted for phylogenetic analyses as previously reported [50,51].

336

337 **Conclusion.** Mosquito monitoring with fast, highly reproducible and reliable tools such as MALDI-  
338 TOF appears essential in today's globalization scenario. The specificity of MS protein profiles for  
339 mosquito legs and thoraxes confirmed that these two body parts are relevant for specimen  
340 identification. Moreover, as the most intense MS peaks were demonstrated to be sufficient for correct

341 classification, the sample which will generate MS spectra of low quality, could anyway identified.  
342 The sharing of reference MS spectra is primordial to accelerate the dissemination of this innovative  
343 tool for a routine use in mosquito identification contributing to adapt control of vectors.  
344



345 **List of abbreviations**

346 *sl: sensu lato; ss: sensu stricto*; MALDI-TOF MS: Matrix Assisted Laser Desorption/Ionization  
347 Time-of-Flight Mass Spectrometry; PCR: Polymerase Chain Reaction; CCI: Composite Correlation  
348 Index; LSV: Log Score Value

349

350 **Declarations**

351 **Ethics approval and consent to participate**

352 Not applicable.

353

354 **Consent for publication**

355 Not applicable.

356

357 **Availability of data and materials**

358 The datasets of MS reference spectra added to the MS DB in the current study are freely available  
359 and downloadable from the additional file 6.

360

361 **Competing interests**

362 The authors declare that they have no competing interests.

363

364 **Funding**

365 This work has been supported by the Délégation Générale pour l'Armement (DGA, MoSIS project,  
366 Grant no PDH-2-NRBC-2-B-2113).

367

368 **Authors' contributions**

369 Conceived and designed the experiments: LA, SB. Performed the experiments: LA, SB, CNG.

370 Analyzed the data: LA, SB. Contributed reagents/materials/analysis tools: MMC, CNG, VPS, ID,

371 RG. Field collections: SB, VPS, ID, RG. Drafted the paper: LA, SB, MMC. Revised critically the  
372 paper: all the authors.

373

#### 374 **Acknowledgments**

375 We would like to acknowledge Samuel Vezenegho and Antoine Adde, from Unite d'Entomologie  
376 Médicale, Institut Pasteur de la Guyane, Cayenne, French Guiana, for their involvement in sample  
377 management. We also acknowledge Albin Fontaine (UPE, IRBA, Marseille) for his help in map  
378 building.

379

380 **References**

- 381 1. Ardillon V, Carvalho L, Prince C, Abboud P, Djossou F. Bilans 2013 et 2014 de la situation  
382 du paludisme en Guyane. *Bull Veille Sanit.* 2015;1: 16–20.
- 383 2. Pommier de Santi V, Dia A, Adde A, Hyvert G, Galant J, Mazevet M, et al. Malaria in French  
384 Guiana Linked to Illegal Gold Mining. *Emerg Infect Dis.* 2016;22: 344–346.  
385 doi:10.3201/eid2202.151292
- 386 3. Pommier de Santi V, Girod R, Mura M, Dia A, Briolant S, Djossou F, et al. Epidemiological  
387 and entomological studies of a malaria outbreak among French armed forces deployed at illegal gold  
388 mining sites reveal new aspects of the disease’s transmission in French Guiana. *Malar J.* 2016;15: 35.  
389 doi:10.1186/s12936-016-1088-x
- 390 4. Douine M, Sanna A, Hiwat H, Briolant S, Nacher M, Belleoud D, et al. Investigation of a  
391 possible malaria epidemic in an illegal gold mine in French Guiana: an original approach in the  
392 remote Amazonian forest. *Malar J.* 2019;18: 91. doi:10.1186/s12936-019-2721-2
- 393 5. Talaga S, Dejean A, Carinci R, Gaborit P, Dusfour I, Girod R. Updated Checklist of the  
394 Mosquitoes (Diptera: Culicidae) of French Guiana. *J Med Entomol.* 2015;52: 770–782.  
395 doi:10.1093/jme/tjv109
- 396 6. Girod R, Gaborit P, Carinci R, Issaly J, Fouque F. *Anopheles darlingi* bionomics and  
397 transmission of *Plasmodium falciparum*, *Plasmodium vivax* and *Plasmodium malariae* in Amerindian  
398 villages of the Upper-Maroni Amazonian forest, French Guiana. *Mem Inst Oswaldo Cruz.* 2008;103:  
399 702–710. doi:10.1590/s0074-02762008000700013
- 400 7. Girod R, Roux E, Berger F, Stefani A, Gaborit P, Carinci R, et al. Unravelling the relationships  
401 between *Anopheles darlingi* (Diptera: Culicidae) densities, environmental factors and malaria  
402 incidence: understanding the variable patterns of malarial transmission in French Guiana (South  
403 America). *Ann Trop Med Parasitol.* 2011;105: 107–122. doi:10.1179/136485911X12899838683322

- 404 8. Fouque F, Gaborit P, Carinci R, Issaly J, Girod R. Annual variations in the number of malaria  
405 cases related to two different patterns of *Anopheles darlingi* transmission potential in the Maroni area  
406 of French Guiana. *Malar J.* 2010;9: 80. doi:10.1186/1475-2875-9-80
- 407 9. Hiwat H, Issaly J, Gaborit P, Somai A, Samjhawan A, Sardjoe P, et al. Behavioral  
408 heterogeneity of *Anopheles darlingi* (Diptera: Culicidae) and malaria transmission dynamics along  
409 the Maroni River, Suriname, French Guiana. *Trans R Soc Trop Med Hyg.* 2010;104: 207–213.  
410 doi:10.1016/j.trstmh.2009.07.007
- 411 10. Dusfour I, Issaly J, Carinci R, Gaborit P, Girod R. Incrimination of *Anopheles* (*Anopheles*)  
412 *intermedius* Peryassú, An. (*Nyssorhynchus*) *nuneztovari* Gabaldón, An. (*Nys.*) *oswaldoi* Peryassú as  
413 natural vectors of *Plasmodium falciparum* in French Guiana. *Mem Inst Oswaldo Cruz.* 2012;107:  
414 429–432. doi:10.1590/s0074-02762012000300021
- 415 11. Ruiz-Lopez F, Wilkerson RC, Ponsonby DJ, Herrera M, Sallum MAM, Velez ID, et al.  
416 Systematics of the *oswaldoi* complex (*Anopheles*, *Nyssorhynchus*) in South America. *Parasit*  
417 *Vectors.* 2013;6: 324. doi:10.1186/1756-3305-6-324
- 418 12. Conn JE, Wilkerson RC, Segura MNO, de Souza RTL, Schlichting CD, Wirtz RA, et al.  
419 Emergence of a new neotropical malaria vector facilitated by human migration and changes in land  
420 use. *Am J Trop Med Hyg.* 2002;66: 18–22. doi:10.4269/ajtmh.2002.66.18
- 421 13. Montoya-Lerma J, Solarte YA, Giraldo-Calderón GI, Quiñones ML, Ruiz-López F,  
422 Wilkerson RC, et al. Malaria vector species in Colombia: a review. *Mem Inst Oswaldo Cruz.*  
423 2011;106 Suppl 1: 223–238. doi:10.1590/s0074-02762011000900028
- 424 14. Beebe NW, Cooper RD. Systematics of malaria vectors with particular reference to the  
425 *Anopheles punctulatus* group. *Int J Parasitol.* 2000;30: 1–17. doi:10.1016/s0020-7519(99)00171-x
- 426 15. Munstermann LE, Conn JE. Systematics of mosquito disease vectors (Diptera, Culicidae):  
427 impact of molecular biology and cladistic analysis. *Annu Rev Entomol.* 1997;42: 351–369.  
428 doi:10.1146/annurev.ento.42.1.351

- 429 16. Van Rensburg AJ, Hunt RH, Koekemoer LL, Coetzee M, Shiff CJ, Minjas J. The polymerase  
430 chain reaction method as a tool for identifying members of the *Anopheles gambiae* complex  
431 (Diptera: Culicidae) in northeastern Tanzania. *J Am Mosq Control Assoc.* 1996;12: 271–274.
- 432 17. Figueiredo MAP, Di Santi SM, Manrique WG, Gonçalves LR, André MR, Machado RZ.  
433 Molecular identification of *Plasmodium* spp. and blood meal sources of anophelines in environmental  
434 reserves on São Luís Island, state of Maranhão, Brazil. *Parasit Vectors.* 2017;10: 203.  
435 doi:10.1186/s13071-017-2133-5
- 436 18. Marrelli MT, Floeter-Winter LM, Malafronte RS, Tadei WP, Lourenço-de-Oliveira R, Flores-  
437 Mendoza C, et al. Amazonian malaria vector anopheline relationships interpreted from ITS2 rDNA  
438 sequences. *Med Vet Entomol.* 2005;19: 208–218. doi:10.1111/j.0269-283X.2005.00558.x
- 439 19. Nebbak A, Koumare S, Willcox AC, Berenger J-M, Raoult D, Almeras L, et al. Field  
440 application of MALDI-TOF MS on mosquito larvae identification. *Parasitology.* 2018;145: 677–687.  
441 doi:10.1017/S0031182017001354
- 442 20. Ratnasingham S, Hebert PDN. bold: The Barcode of Life Data System  
443 (<http://www.barcodinglife.org>). *Mol Ecol Notes.* 2007;7: 355–364. doi:10.1111/j.1471-  
444 8286.2007.01678.x
- 445 21. Versteirt V, Nagy ZT, Roelants P, Denis L, Breman FC, Damiens D, et al. Identification of  
446 Belgian mosquito species (Diptera: Culicidae) by DNA barcoding. *Mol Ecol Resour.* 2015;15: 449–  
447 457. doi:10.1111/1755-0998.12318
- 448 22. Norris LC, Norris DE. Phylogeny of anopheline (Diptera: Culicidae) species in southern  
449 Africa, based on nuclear and mitochondrial genes. *J Vector Ecol J Soc Vector Ecol.* 2015;40: 16–27.  
450 doi:10.1111/jvec.12128
- 451 23. Laurito M, Oliveira TMP de, Almirón WR, Sallum MAM. COI barcode versus morphological  
452 identification of *Culex* (*Culex*) (Diptera: Culicidae) species: a case study using samples from  
453 Argentina and Brazil. *Mem Inst Oswaldo Cruz.* 2013;108 Suppl 1: 110–122. doi:10.1590/0074-  
454 0276130457

- 455 24. Wang G, Li C, Guo X, Xing D, Dong Y, Wang Z, et al. Identifying the main mosquito species  
456 in China based on DNA barcoding. *PloS One*. 2012;7: e47051. doi:10.1371/journal.pone.0047051
- 457 25. Yssouf A, Almeras L, Raoult D, Parola P. Emerging tools for identification of arthropod  
458 vectors. *Future Microbiol*. 2016;11: 549–566. doi:10.2217/fmb.16.5
- 459 26. Yssouf A, Parola P, Lindström A, Lilja T, L'Ambert G, Bondesson U, et al. Identification of  
460 European mosquito species by MALDI-TOF MS. *Parasitol Res*. 2014;113: 2375–2378.  
461 doi:10.1007/s00436-014-3876-y
- 462 27. Dieme C, Yssouf A, Vega-Rúa A, Berenger J-M, Failloux A-B, Raoult D, et al. Accurate  
463 identification of Culicidae at aquatic developmental stages by MALDI-TOF MS profiling. *Parasit*  
464 *Vectors*. 2014;7: 544. doi:10.1186/s13071-014-0544-0
- 465 28. Schaffner F, Kaufmann C, Pflüger V, Mathis A. Rapid protein profiling facilitates  
466 surveillance of invasive mosquito species. *Parasit Vectors*. 2014;7: 142. doi:10.1186/1756-3305-7-  
467 142
- 468 29. Mewara A, Sharma M, Kaura T, Zaman K, Yadav R, Sehgal R. Rapid identification of  
469 medically important mosquitoes by matrix-assisted laser desorption/ionization time-of-flight mass  
470 spectrometry. *Parasit Vectors*. 2018;11: 281. doi:10.1186/s13071-018-2854-0
- 471 30. Müller P, Pflüger V, Wittwer M, Ziegler D, Chandre F, Simard F, et al. Identification of  
472 cryptic *Anopheles* mosquito species by molecular protein profiling. *PloS One*. 2013;8: e57486.  
473 doi:10.1371/journal.pone.0057486
- 474 31. Yssouf A, Socolovschi C, Flaudrops C, Ndiath MO, Sougoufara S, Dehecq J-S, et al. Matrix-  
475 assisted laser desorption ionization--time of flight mass spectrometry: an emerging tool for the rapid  
476 identification of mosquito vectors. *PloS One*. 2013;8: e72380. doi:10.1371/journal.pone.0072380
- 477 32. Raharimalala FN, Andrianarivomanana TM, Rakotondrasoa A, Collard JM, Boyer S.  
478 Usefulness and accuracy of MALDI-TOF mass spectrometry as a supplementary tool to identify  
479 mosquito vector species and to invest in development of international database. *Med Vet Entomol*.  
480 2017;31: 289–298. doi:10.1111/mve.12230

- 481 33. Tandina F, Almeras L, Koné AK, Doumbo OK, Raoult D, Parola P. Use of MALDI-TOF MS  
482 and culturomics to identify mosquitoes and their midgut microbiota. *Parasit Vectors*. 2016;9: 495.  
483 doi:10.1186/s13071-016-1776-y
- 484 34. Nebbak A, Almeras L. Identification of *Aedes* mosquitoes by MALDI-TOF MS biotyping  
485 using protein signatures from larval and pupal exuviae. *Parasit Vectors*. 2020;13: 161.  
486 doi:10.1186/s13071-020-04029-x
- 487 35. Nebbak A, El Hamzaoui B, Berenger J-M, Bitam I, Raoult D, Almeras L, et al. Comparative  
488 analysis of storage conditions and homogenization methods for tick and flea species for identification  
489 by MALDI-TOF MS. *Med Vet Entomol*. 2017;31: 438–448. doi:10.1111/mve.12250
- 490 36. Nebbak A, Willcox AC, Bitam I, Raoult D, Parola P, Almeras L. Standardization of sample  
491 homogenization for mosquito identification using an innovative proteomic tool based on protein  
492 profiling. *Proteomics*. 2016;16: 3148–3160. doi:10.1002/pmic.201600287
- 493 37. Vega-Rúa A, Pagès N, Fontaine A, Nuccio C, Hery L, Goindin D, et al. Improvement of  
494 mosquito identification by MALDI-TOF MS biotyping using protein signatures from two body parts.  
495 *Parasit Vectors*. 2018;11: 574. doi:10.1186/s13071-018-3157-1
- 496 38. Vega-Rúa A, Pagès N, Fontaine A, Nuccio C, Hery L, Goindin D, et al. Improvement of  
497 mosquito identification by MALDI-TOF MS biotyping using protein signatures from two body parts.  
498 *Parasit Vectors*. 2018;11: 574. doi:10.1186/s13071-018-3157-1
- 499 39. Adde A, Roux E, Mangeas M, Dessay N, Nacher M, Dusfour I, et al. Dynamical Mapping of  
500 *Anopheles darlingi* Densities in a Residual Malaria Transmission Area of French Guiana by Using  
501 Remote Sensing and Meteorological Data. *PloS One*. 2016;11: e0164685.  
502 doi:10.1371/journal.pone.0164685
- 503 40. Adde A, Dusfour I, Roux E, Girod R, Briolant S. *Anopheles* fauna of coastal Cayenne, French  
504 Guiana: modelling and mapping of species presence using remotely sensed land cover data. *Mem Inst*  
505 *Oswaldo Cruz*. 2016;111: 750–756. doi:10.1590/0074-02760160272

- 506 41. Vezenegho SB, Adde A, Pommier de Santi V, Issaly J, Carinci R, Gaborit P, et al. High  
507 malaria transmission in a forested malaria focus in French Guiana: How can exophagic *Anopheles*  
508 *darlingi* thwart vector control and prevention measures? *Mem Inst Oswaldo Cruz*. 2016;111: 561–  
509 569. doi:10.1590/0074-02760160150
- 510 42. Folmer O, Black M, Hoeh W, Lutz R, Vrijenhoek R. DNA primers for amplification of  
511 mitochondrial cytochrome c oxidase subunit I from diverse metazoan invertebrates. *Mol Mar Biol*  
512 *Biotechnol*. 1994;3: 294–299.
- 513 43. Nebbak A, Willcox AC, Bitam I, Raoult D, Parola P, Almeras L. Standardization of sample  
514 homogenization for mosquito identification using an innovative proteomic tool based on protein  
515 profiling. *Proteomics*. 2016;16: 3148–3160. doi:10.1002/pmic.201600287
- 516 44. Lafri I, Almeras L, Bitam I, Caputo A, Yssouf A, Forestier C-L, et al. Identification of  
517 Algerian Field-Caught Phlebotomine Sand Fly Vectors by MALDI-TOF MS. *PLoS Negl Trop Dis*.  
518 2016;10: e0004351. doi:10.1371/journal.pntd.0004351
- 519 45. Tamura K, Nei M. Estimation of the number of nucleotide substitutions in the control region  
520 of mitochondrial DNA in humans and chimpanzees. *Mol Biol Evol*. 1993;10: 512–526.  
521 doi:10.1093/oxfordjournals.molbev.a040023
- 522 46. Sinka ME, Bangs MJ, Manguin S, Rubio-Palis Y, Chareonviriyaphap T, Coetzee M, et al. A  
523 global map of dominant malaria vectors. *Parasit Vectors*. 2012;5: 69. doi:10.1186/1756-3305-5-69
- 524 47. Musset L, Pelleau S, Girod R, Ardillon V, Carvalho L, Dusfour I, et al. Malaria on the Guiana  
525 Shield: a review of the situation in French Guiana. *Mem Inst Oswaldo Cruz*. 2014;109: 525–533.  
526 doi:10.1590/0074-0276140031
- 527 48. Boyer PH, Boulanger N, Nebbak A, Collin E, Jaulhac B, Almeras L. Assessment of MALDI-  
528 TOF MS biotyping for *Borrelia burgdorferi* sl detection in *Ixodes ricinus*. *PloS One*. 2017;12:  
529 e0185430. doi:10.1371/journal.pone.0185430



- 530 49. Boyer PH, Almeras L, Plantard O, Grillon A, Talagrand-Reboul É, McCoy K, et al.  
531 Identification of closely related Ixodes species by protein profiling with MALDI-TOF mass  
532 spectrometry. *PloS One*. 2019;14: e0223735. doi:10.1371/journal.pone.0223735
- 533 50. Kumsa B, Laroche M, Almeras L, Mediannikov O, Raoult D, Parola P. Morphological,  
534 molecular and MALDI-TOF mass spectrometry identification of ixodid tick species collected in  
535 Oromia, Ethiopia. *Parasitol Res*. 2016;115: 4199–4210. doi:10.1007/s00436-016-5197-9
- 536 51. Karger A, Kampen H, Bettin B, Dautel H, Ziller M, Hoffmann B, et al. Species determination  
537 and characterization of developmental stages of ticks by whole-animal matrix-assisted laser  
538 desorption/ionization mass spectrometry. *Ticks Tick-Borne Dis*. 2012;3: 78–89.  
539 doi:10.1016/j.ttbdis.2011.11.002
- 540
- 541

542 **Figure legends**

543 **Figure 1. Map of mosquito collection sites in French Guiana.** The different sampling sites are  
544 indicated by circles.

545

546 **Figure 2. Comparison of MALDI-TOF MS spectra from legs (A) and thoraxes (B) of *Anopheles***  
547 **mosquitoes.** Representative MS spectra of *An. peryassui* (a, b), *An. intermedius* (c, d), *An. oswaldoi*  
548 (e, f), *An. aquasalis* (g, h), *An. braziliensis* (i, j), *An. darlingi* (k, l), *An. nuneztovari* (m, n), and *An.*  
549 *triannulatus* (o, p) are shown. MS spectra from two distinct specimens per species were selected,  
550 excepted for *An. oswaldoi*. As only one specimen was available for this species, MS spectra from  
551 biological replicates were presented. a.u., arbitrary units; m/z, mass-to-charge ratio.

552

553 **Figure 3. MSP dendrogram of MALDI-TOF MS spectra from legs (A) and thoraxes (B) of**  
554 ***Anopheles* mosquitoes.** Two specimens per species were used to construct the dendrogram, at the  
555 exception of *An. oswaldoi*, for which only one specimen was available. The dendrogram was created  
556 using Biotyper v3.0 software and distance units correspond to the relative similarity of MS spectra.  
557 The *Anopheles* and *Nyssorhynchus* subgenus were indicated at the right part.

558

559 **Figure 4. Comparison of paired body parts LSVs from MS spectra of *Anopheles* species.** Dashed  
560 lines represent the threshold values (black and grey for LSV threshold of 1.8 and 2.0, respectively),  
561 for relevant identification. LSV, log score value.

562 **Additional files:**

563 **Additional file 1. Unrooted Maximum-Likelihood trees based on the sequences of the COI gene**  
564 **of the 15 specimens included in the MS database.**

565

566 **Additional file 2. Principal Component Analysis (PCA) from MS spectra of legs and thoraxes**  
567 **from *Anopheles* mosquitoes.** PCA dimensional image from MS spectra of legs (red dots) and  
568 thoraxes (green dots) from *An. intermedius* (A), *An. aquasalis* (B), *An. braziliensis* (C), *An. darlingi*  
569 (D), *An. nuneztovari* (E), *An. triannulatus* (F) and *An. peryassui* (G). Respectively, 10, 22, 18, 22,  
570 20, 20 and 3 specimens per species were included. Quadruplicate of each sample per body part were  
571 presented.

572

573 **Additional file 3. Top-five and -ten mass peak lists per mosquito species using legs as biologic**  
574 **material.**

575

576 **Additional file 4. Top-five and -ten mass peak lists per mosquito species using thoraxes as**  
577 **biologic material.**

578

579 **Additional file 5. LSVs obtained following homemade MS reference database query with MS**  
580 **spectra of legs (A) and thoraxes (B) from *Anopheles* mosquitoes.** Horizontal dashed lines represent  
581 the threshold value for reliable identification (black and grey for LSV threshold of 1.8 and 2.0,  
582 respectively). LSVs, log score values; a.u., arbitrary units.

583

584 **Additional file 6. Raw MS spectra from legs and thoraxes of mosquitoes added to the MS**  
585 **reference database.** MS spectra were obtained using Microflex LT MALDI-TOF Mass Spectrometer  
586 (Bruker Daltonics).

587

**Table 1.** Overview of *Anopheles* mosquito origins and subgroup identification by COI molecular typing

| Morphological identification | Catching site (Latitude/Longitude) | Catching period   | Number of specimens (Ref. MS DB§) | Species identified by NCBI (Accession Number) | COI gene sequence coverage (%) / identity (%) | Species identified by BOLD                        | COI gene sequence similarity (%) |
|------------------------------|------------------------------------|-------------------|-----------------------------------|-----------------------------------------------|-----------------------------------------------|---------------------------------------------------|----------------------------------|
| <i>An. peryassui</i>         | Cacao (4.57/52.47)                 | (June-2015)       | 3 (2)                             | NC_037790.1                                   | 99/99                                         | KF698875                                          | 97.84                            |
| <i>An. intermedius</i>       | Cacao (4.57/52.47)                 | (June-2015)       | 10 (2)                            | MF381700.1 /<br>NC_037789.1                   | 99/98                                         | Early release                                     | 98.62-<br>99.39                  |
| <i>An. oswaldoi</i>          | Eau Claire (3.60/53.5)             | (June-2014)       | 1 (1)                             | MG241906.1                                    | 93/99                                         | 51917708                                          | 97.85                            |
| <i>An. aquasalis</i>         | Cayenne (4.89/52.30)               | (Sept./Oct.-2014) | 22 (2)                            | KC354822.1                                    | 99/98                                         | KC354821                                          | 98.15-<br>98.29                  |
| <i>An. braziliensis</i>      | Cacao (4.57/52.47)                 | (June-2015)       | 18 (2)                            | NC_037791.1 /<br>MF381732.1                   | 99/99                                         | Private /<br>DQ913839 /<br>DQ913846 /<br>DQ913825 | 98.91-<br>99.73                  |
| <i>An. darlingi</i>          | Blondin (3.87/51.81)               | (Sept.-2015)      | 22 (2)                            | MF381596.1 /<br>MF381713.1                    | 99/99                                         | JF923694 /<br>private                             | 99.85-100                        |
| <i>An. nuneztovari</i>       | Dorlin (3.75/53.55)                | (March-2013)      | 20 (2)                            | NC_037810.1 /<br>MF381656.1                   | 99/99                                         | KU865547 /<br>KC167737                            | 99.83-100                        |
| <i>An. triannulatus</i>      | Saint Georges (3.89/51.81)         | (May/June-2014)   | 20 (2)                            | MF381730.1 /<br>JX205112.1                    | 99/99                                         | Early-Release<br>/ KC167680                       | 99.54-<br>99.83                  |
| <b>Total</b>                 |                                    |                   | <b>111 (15)</b>                   |                                               |                                               |                                                   |                                  |

589

§Ref. MS DB: Number of specimens used to create the reference MS database. \*Mosquito species for whose COI gene sequences are not available (N.A.) in the database (27th November 2018). #No reliable ID: Identity with top match < 97 %. BOLD: Barcode of Life Data Systems; COI: cytochrome oxidase one.

590

591

592

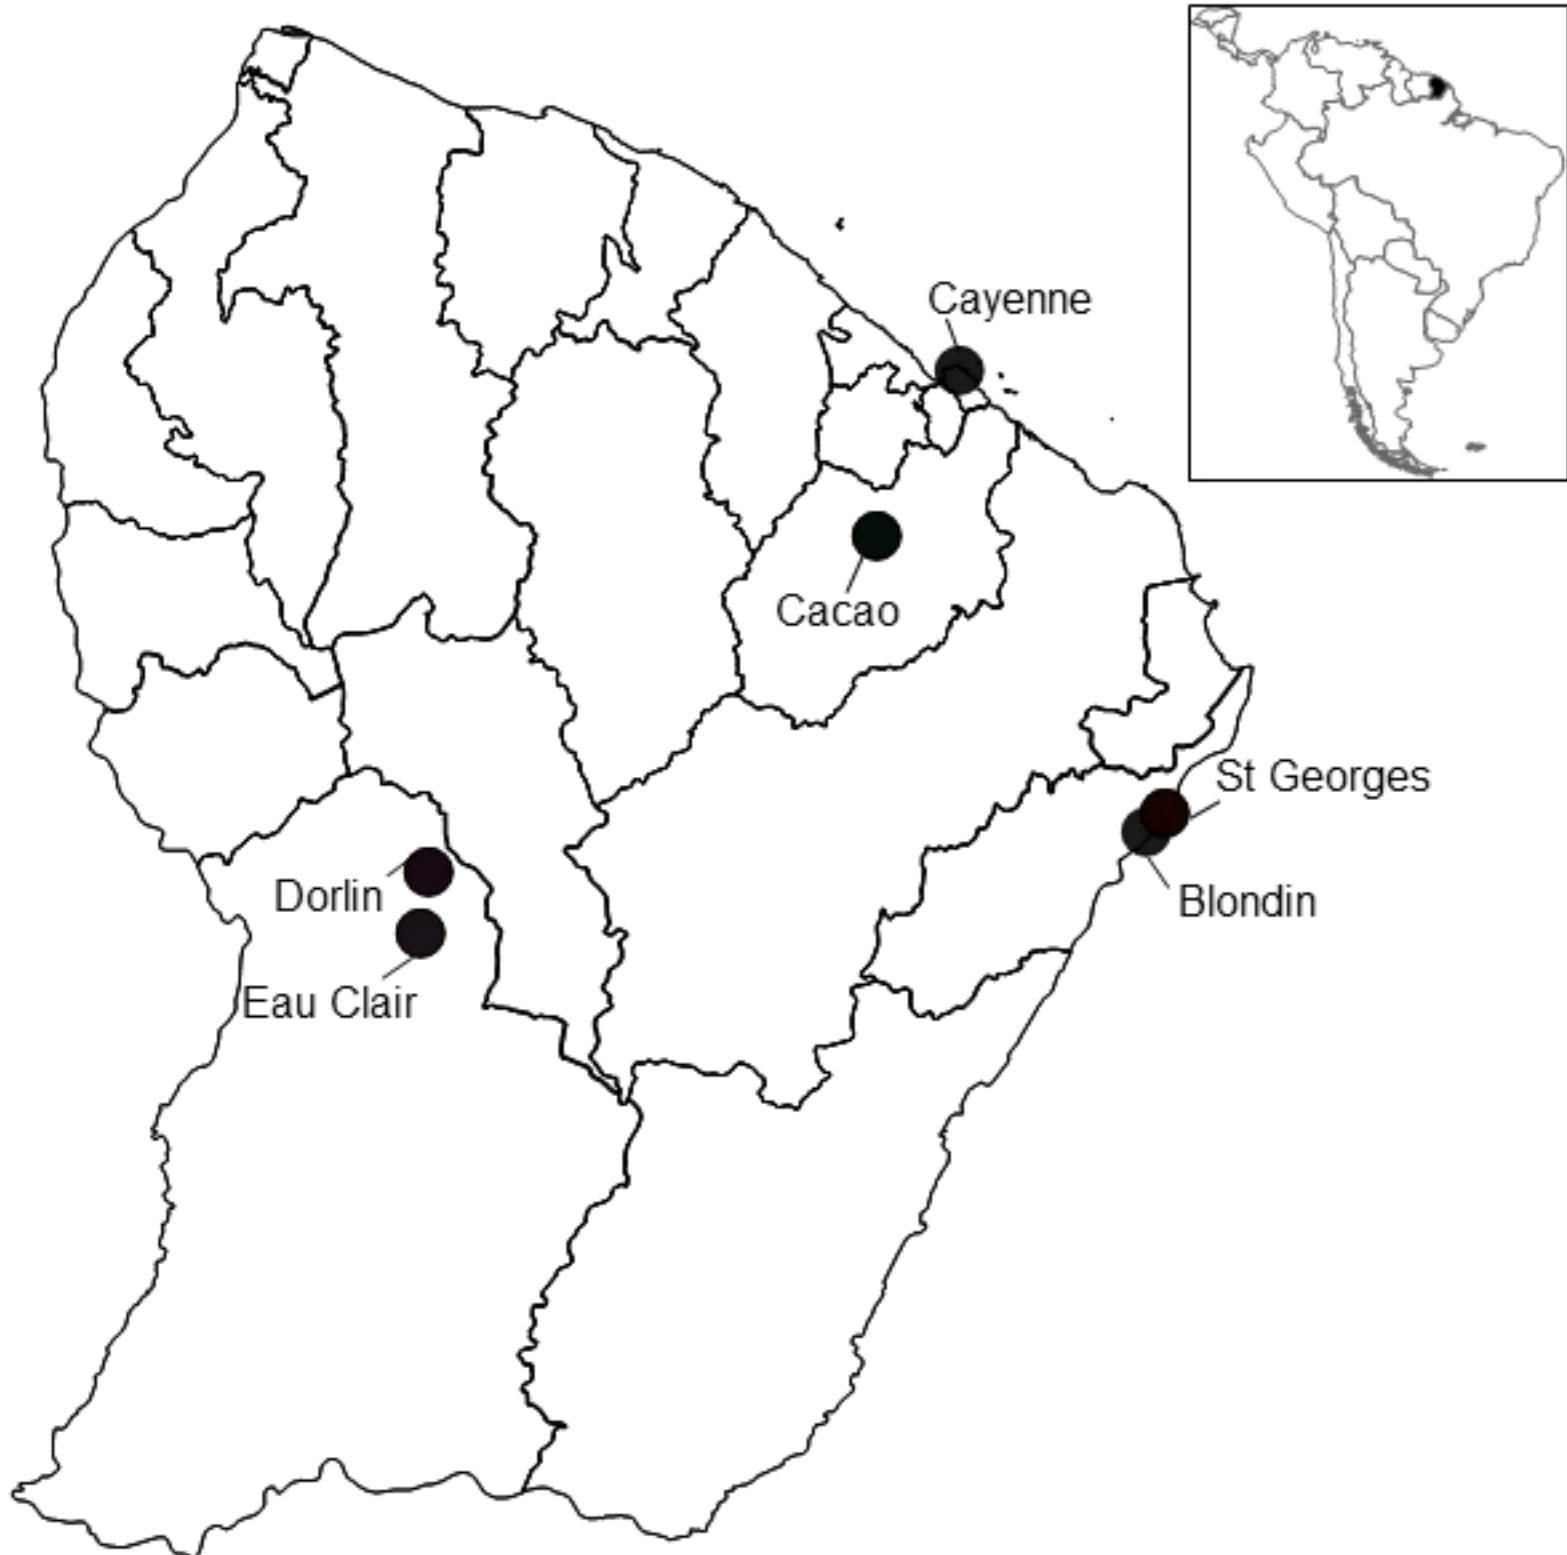

Figure-1

**A**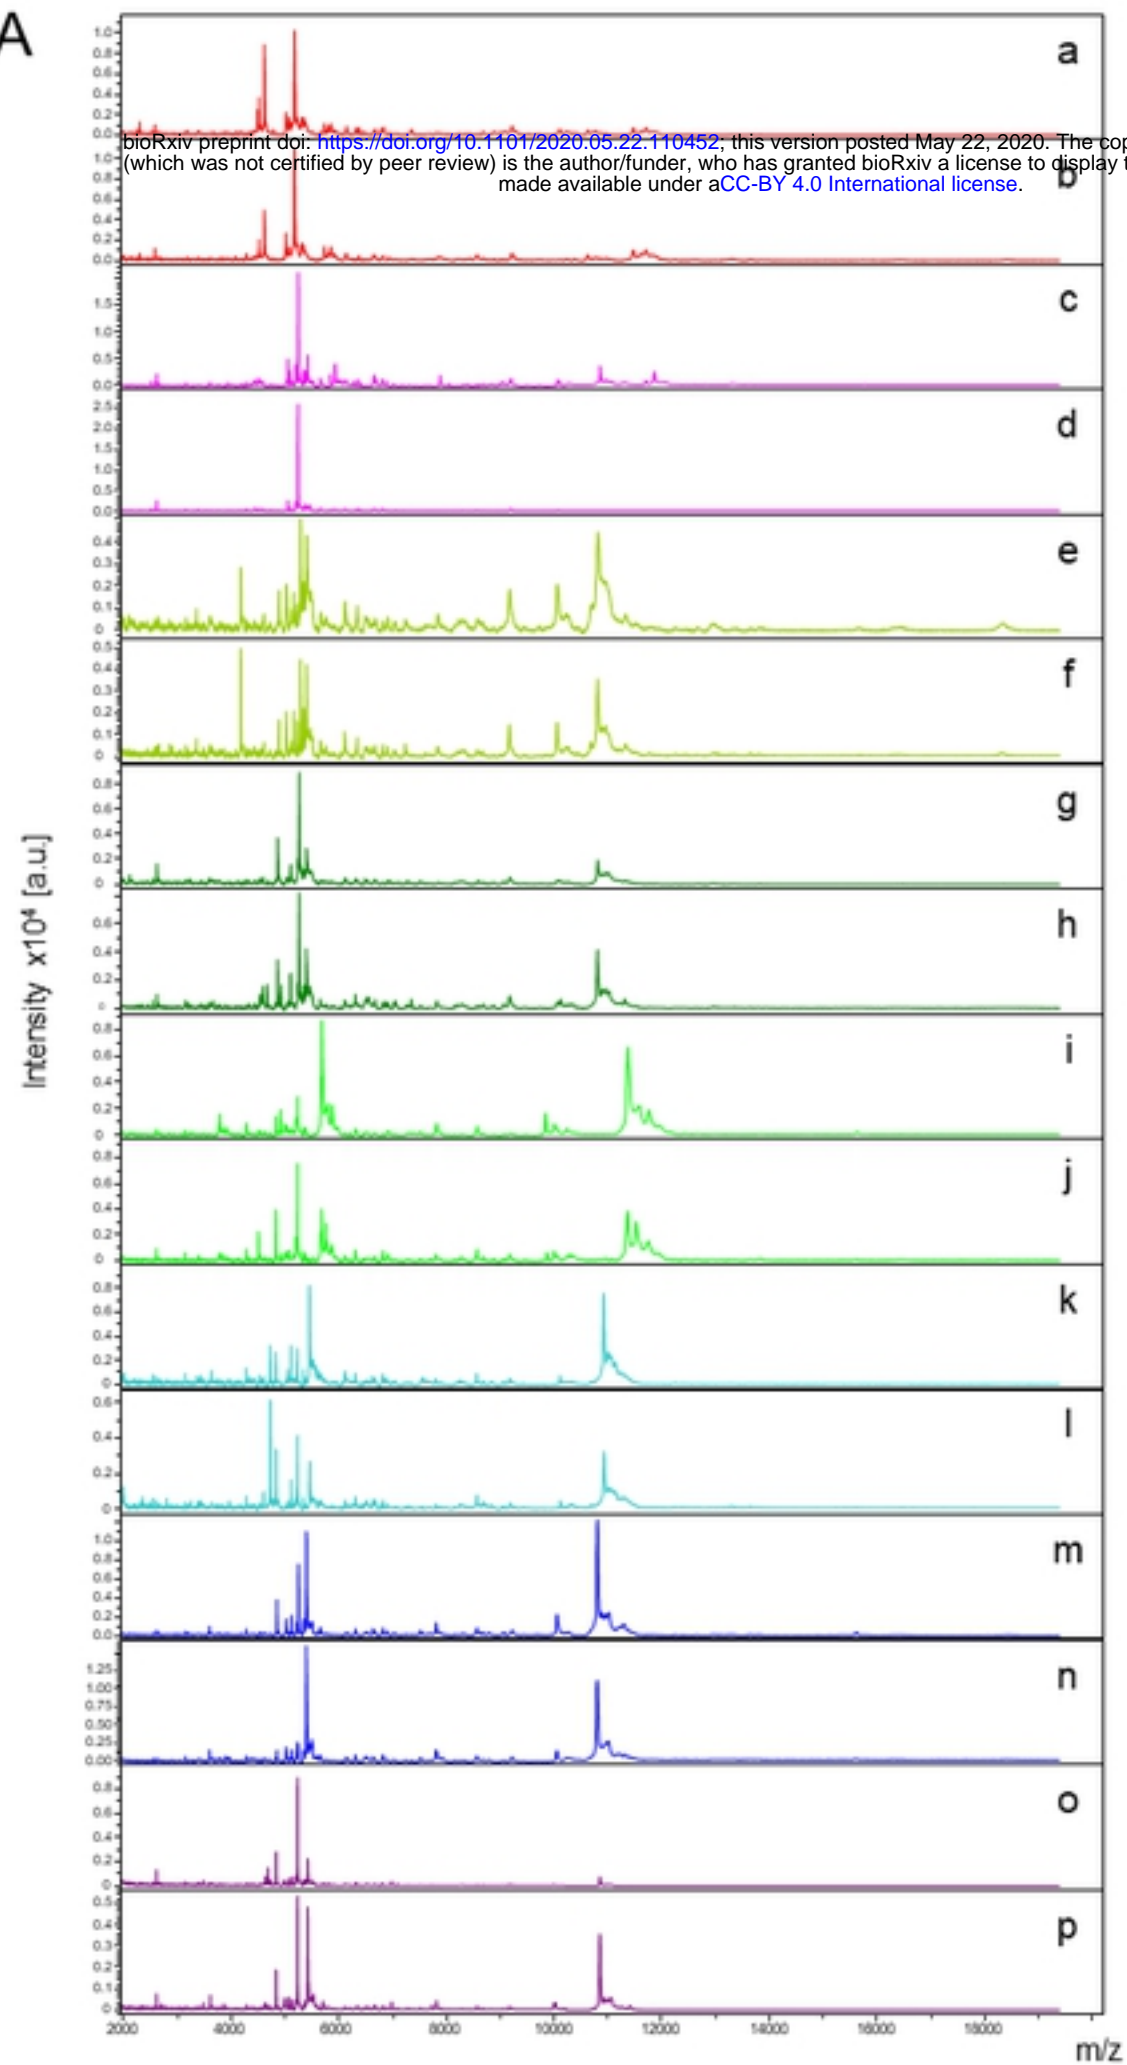**B**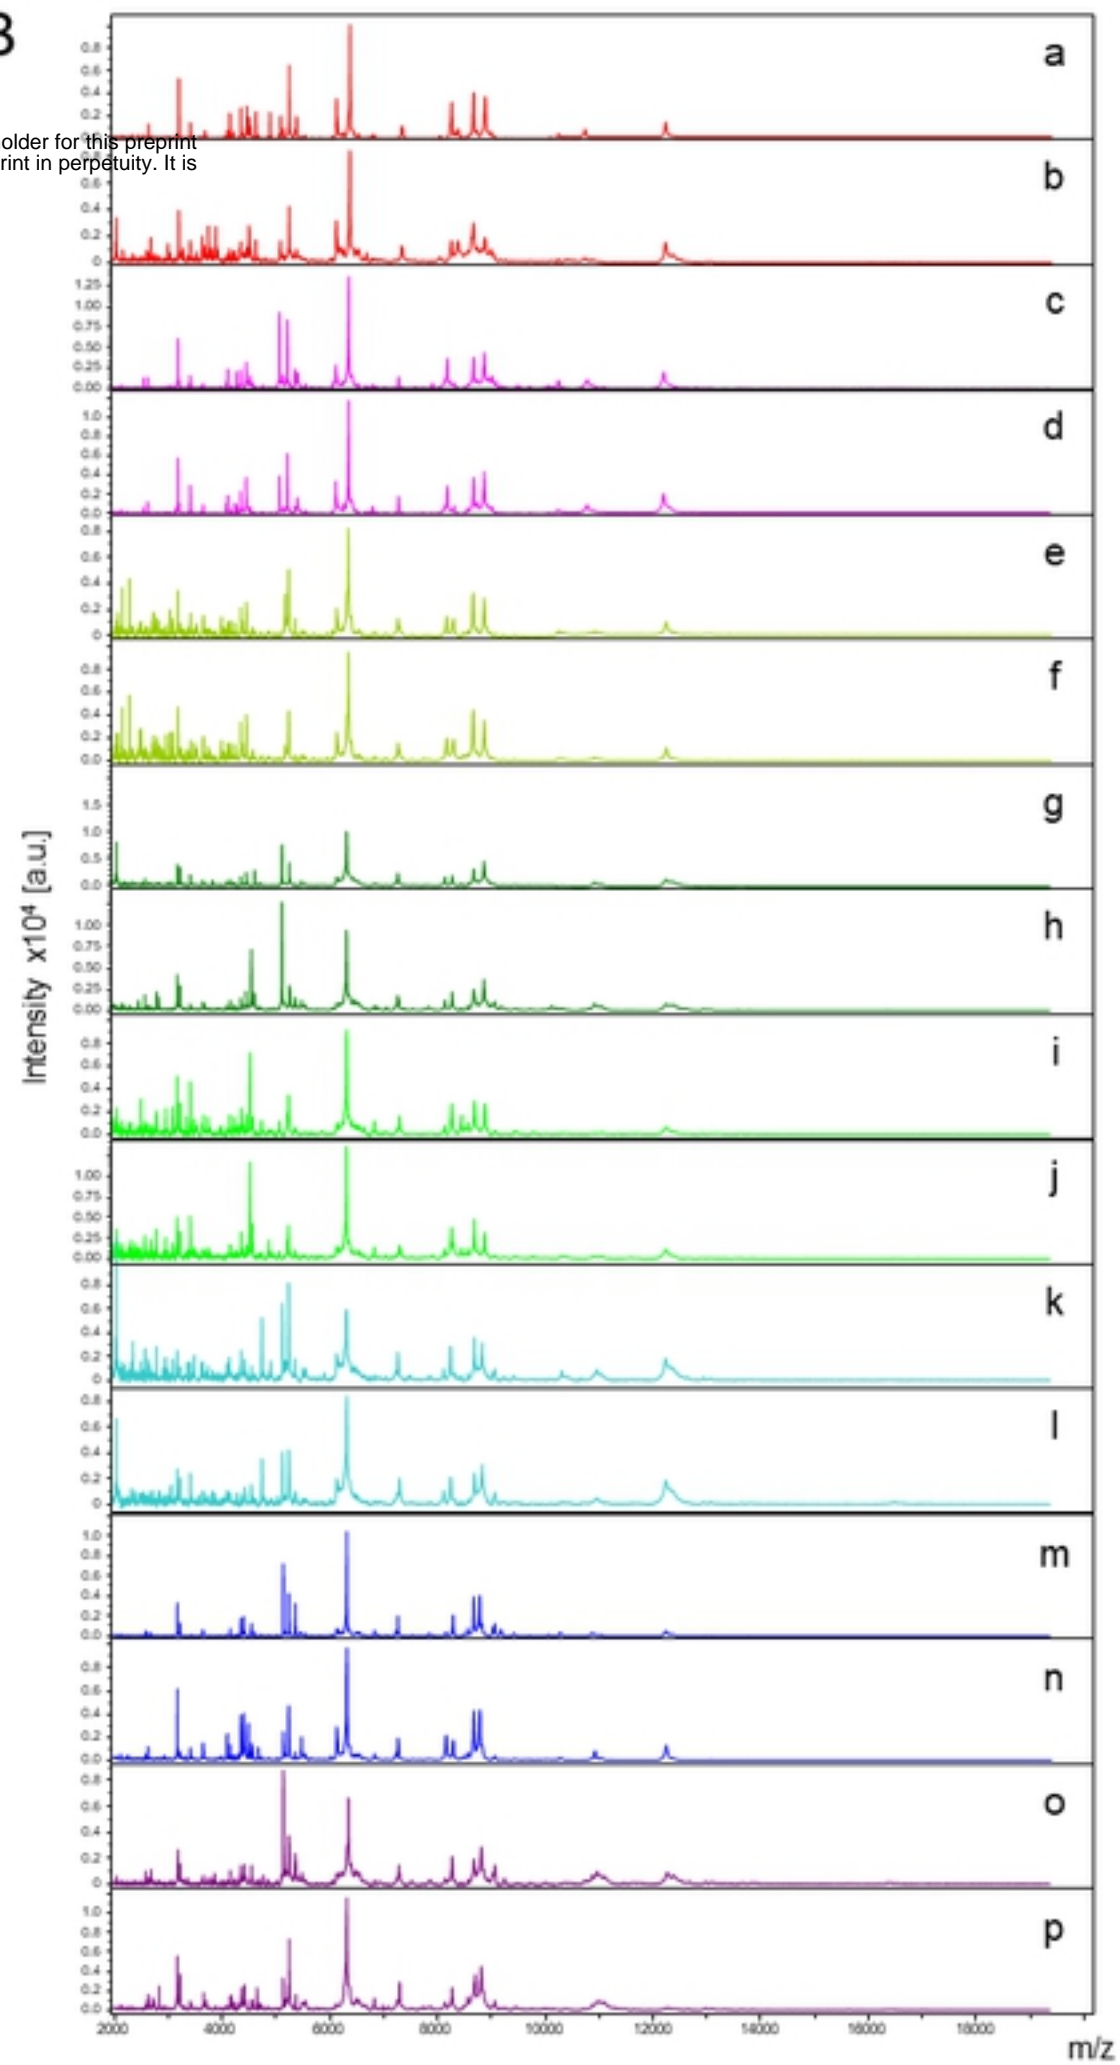**Figure-2**

A

bioRxiv preprint doi: <https://doi.org/10.1101/2020.05.22.110452>; this version posted May 22, 2020. The copyright holder for this preprint (which was not certified by peer review) is the author/funder, who has granted bioRxiv a license to display the preprint in perpetuity. It is made available under aCC-BY 4.0 International license.

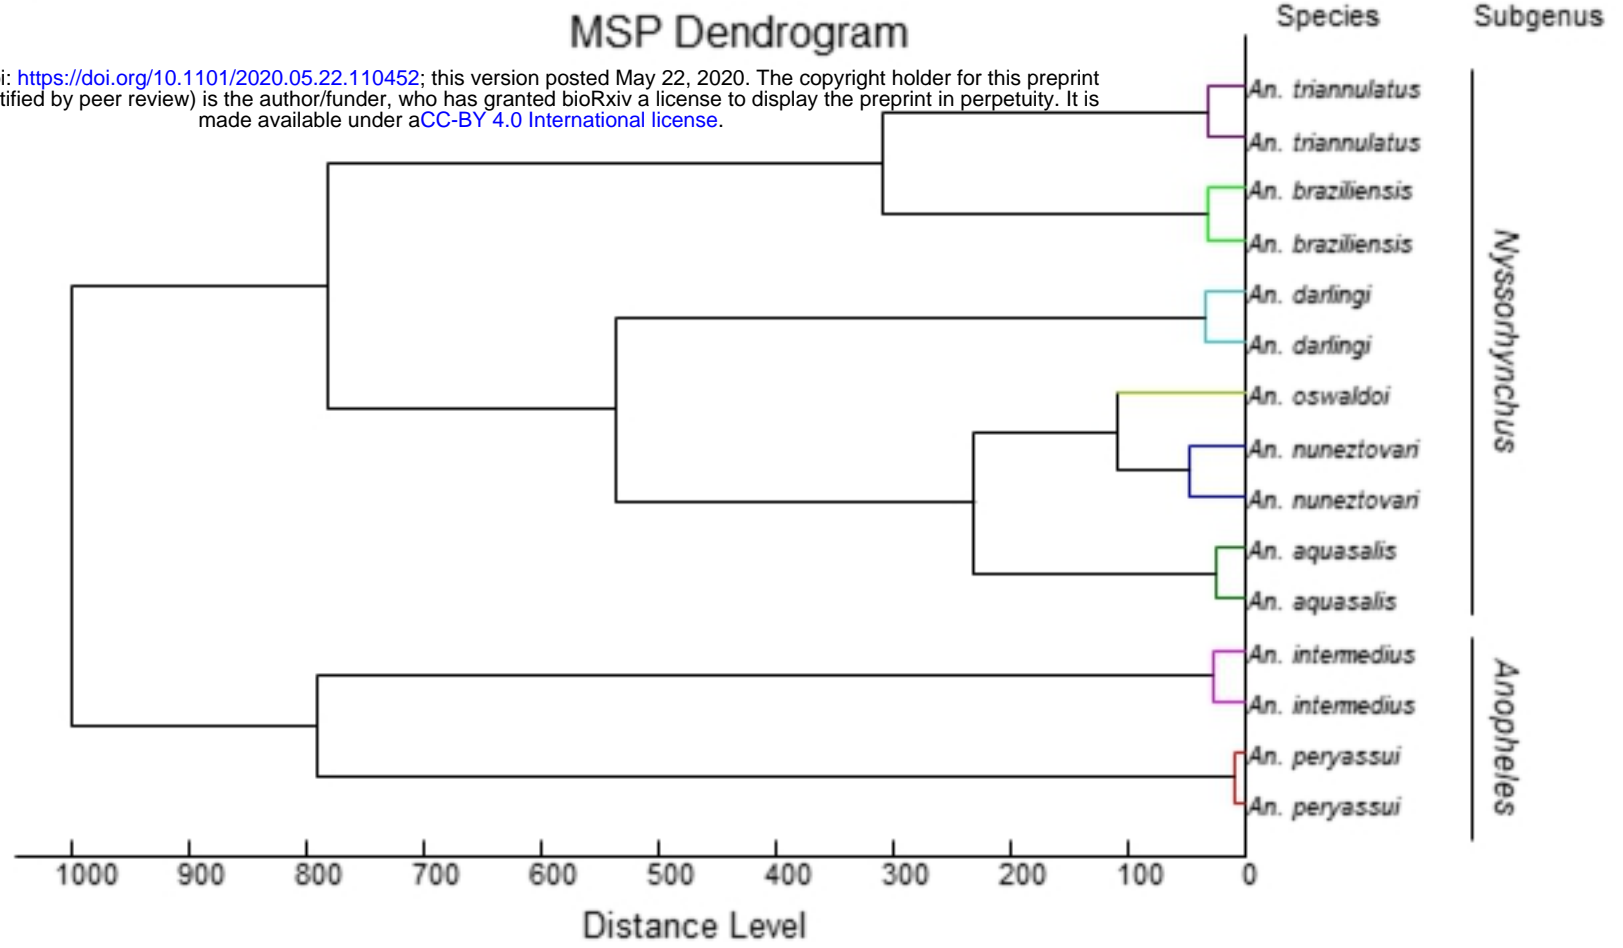

B

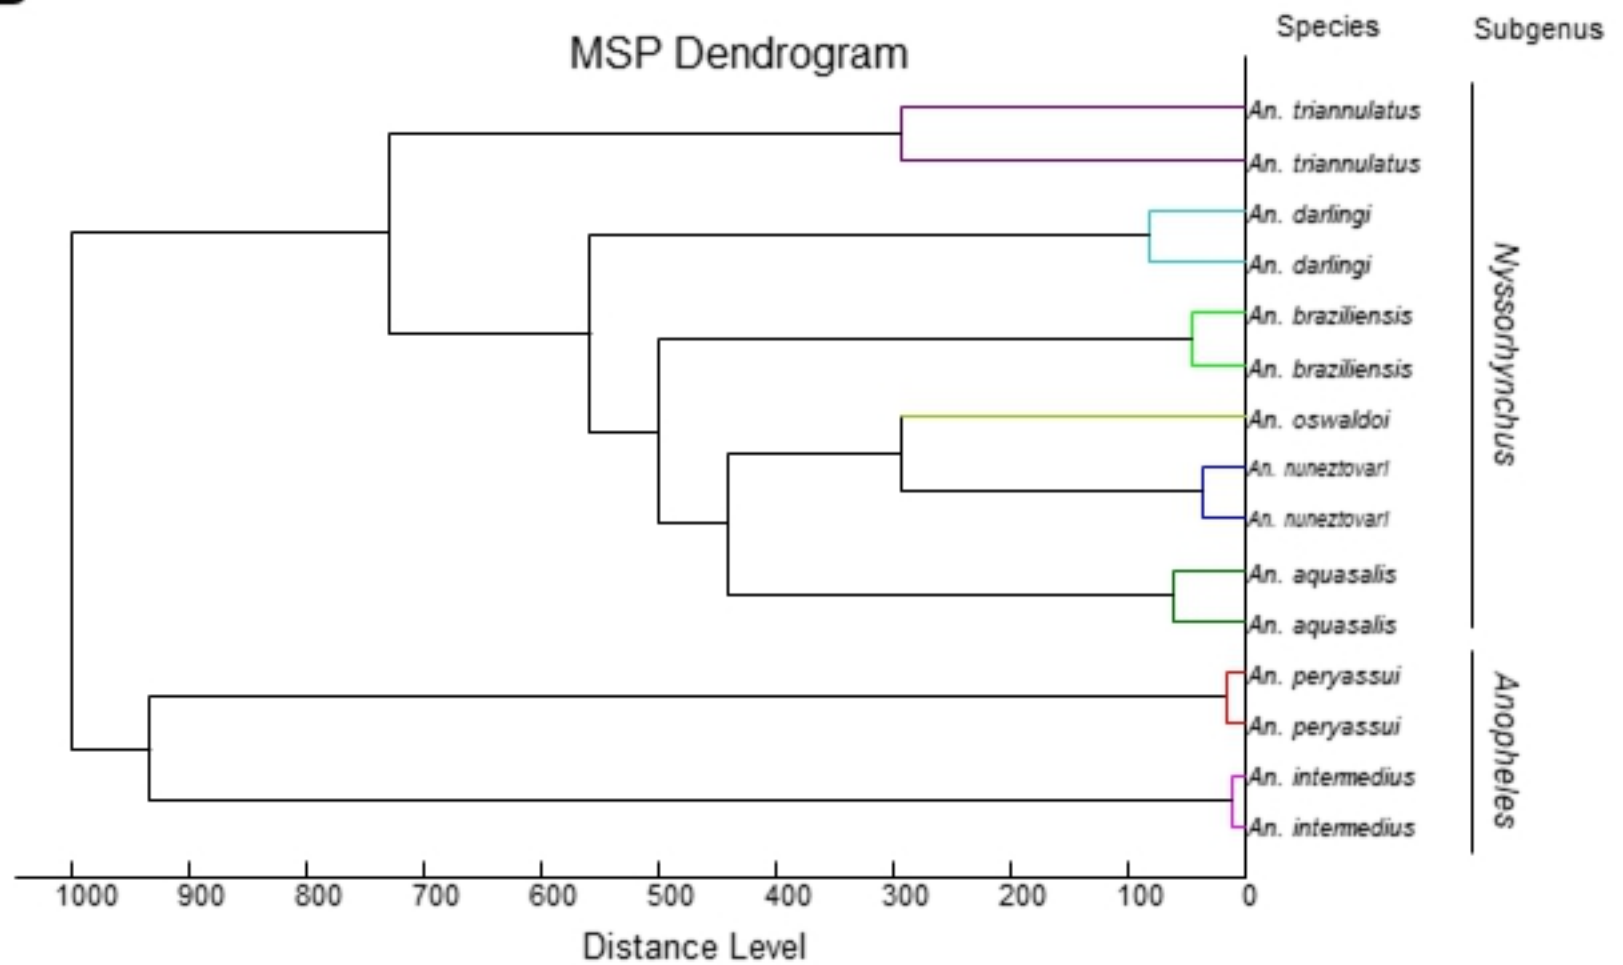

Figure-3

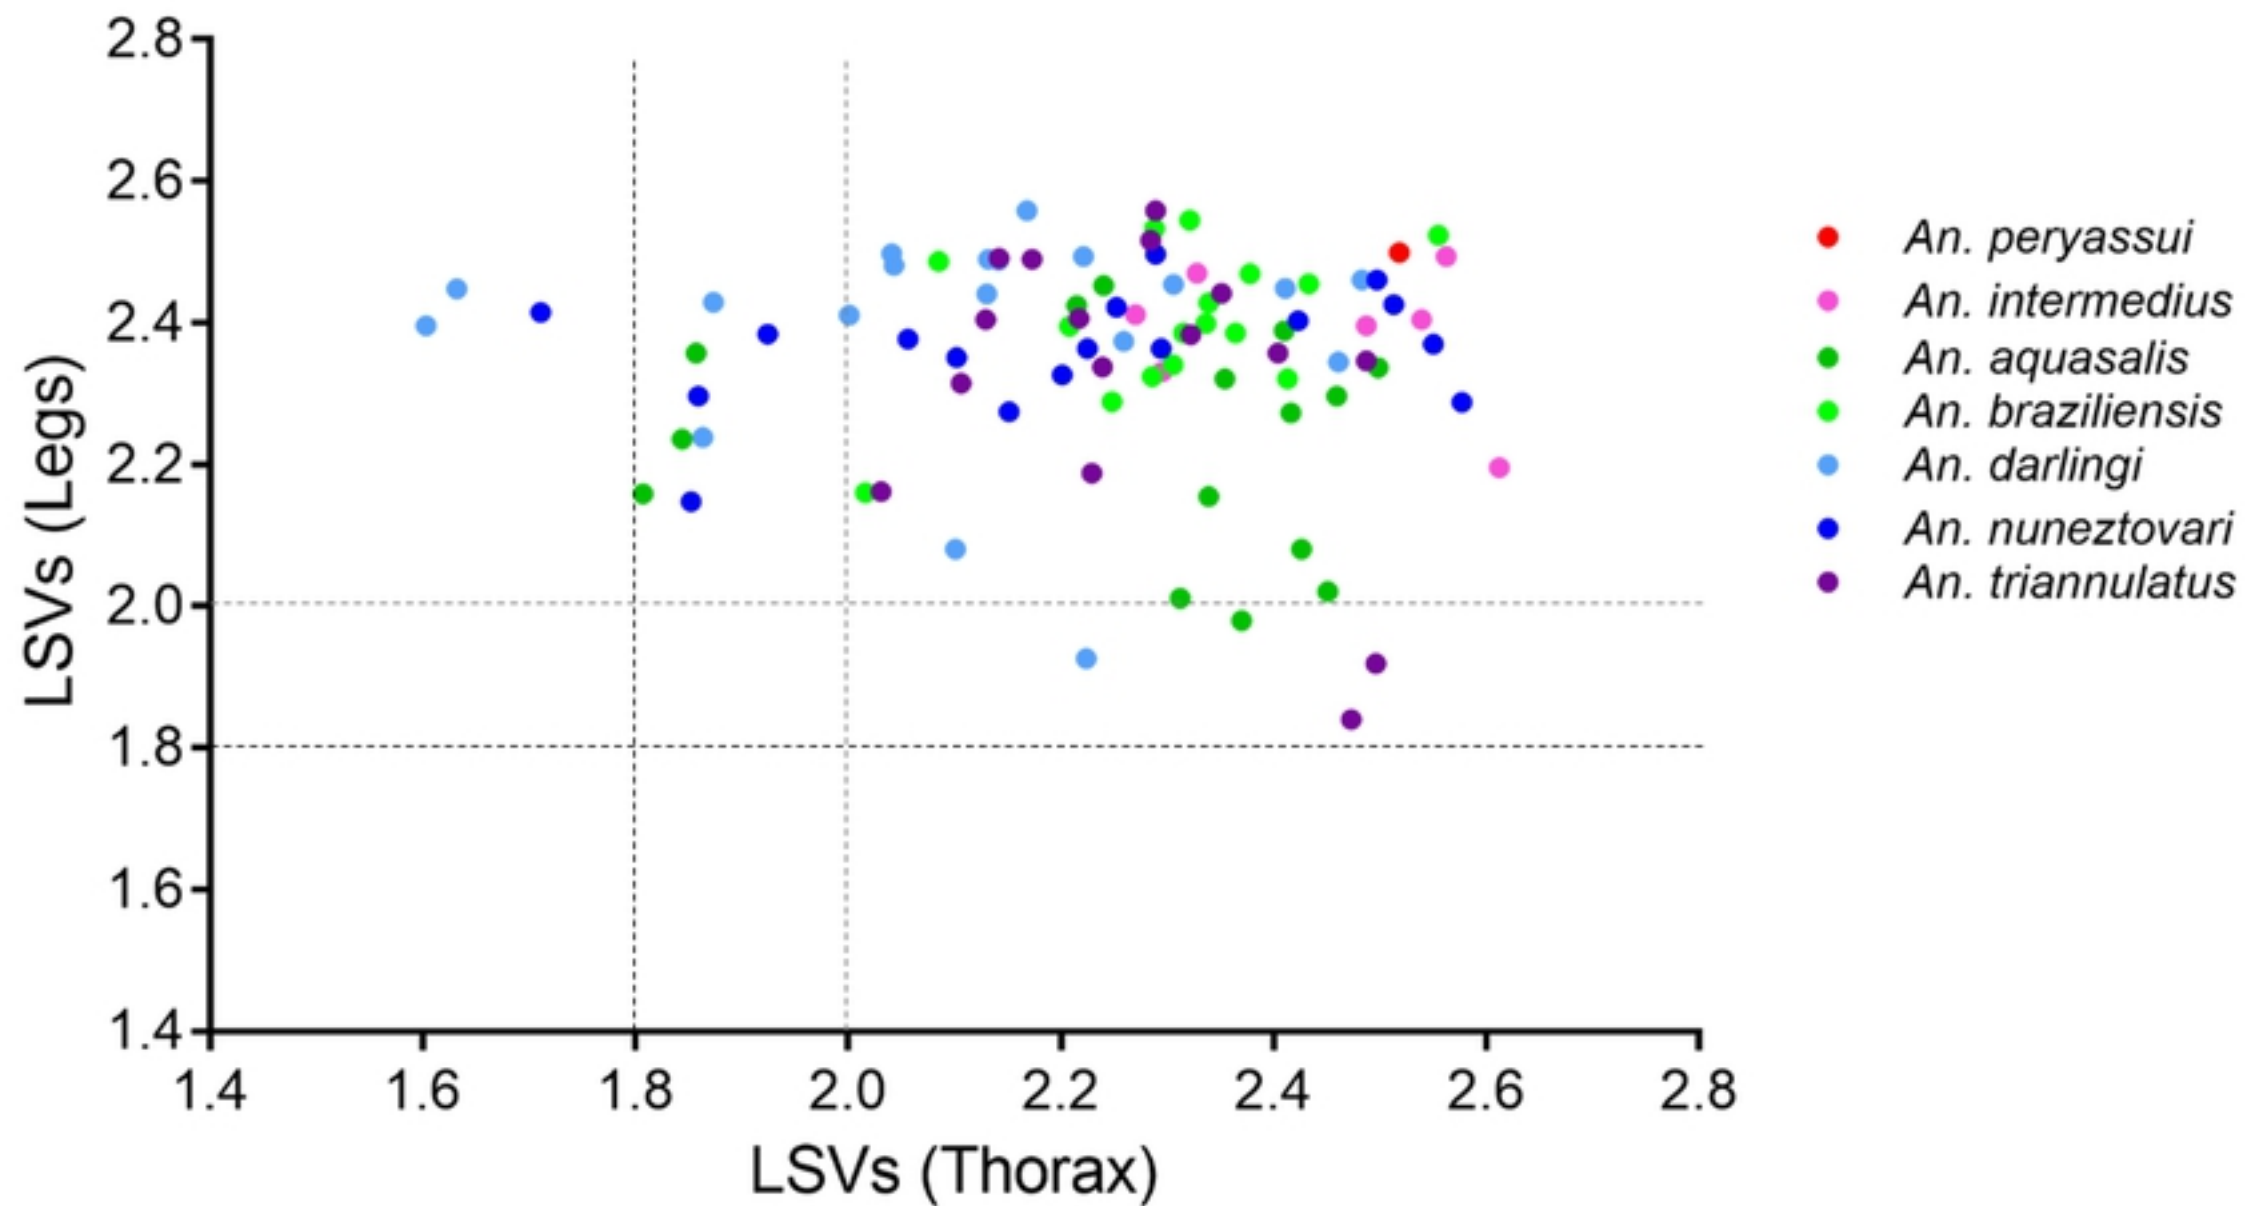

Figure-4
